# Supplementary material for: Short and Long-Term Mortality Trends for Cancer Patients with Septic Shock Stratified by Cancer Type from 2009 to 2017: A Population-Based Cohort Study
Source: PubMed Central journal article supplement (PMC7931033; doi:10.3390/cancers13040657), 2021-02-06

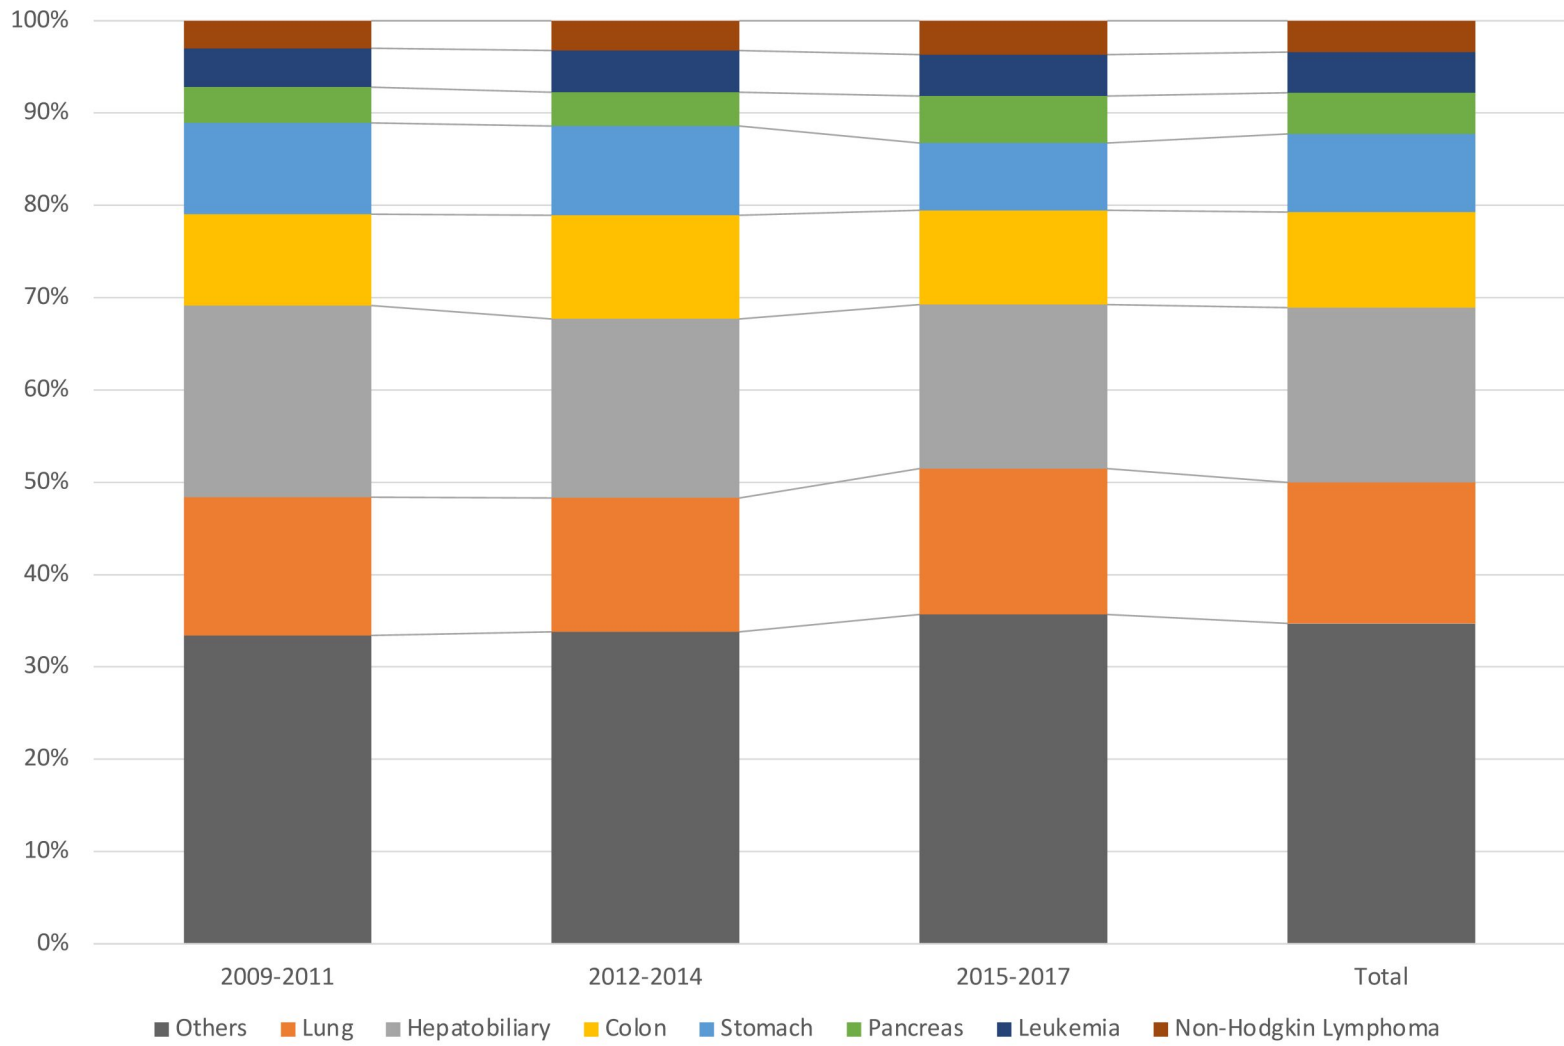

Supplement: cancers-13-00657-s001.pdf [file cancers-13-00657-s001.pdf]
